# Supplementary material
Source: ML conference proceedings conference paper supplement (https://proceedings.mlr.press/v119/chou20a.html)
Supplement: Supplementary file 1 [file chou20a-supp.pdf]

---

## Supplementary Material for Unbiased Risk Estimators Can Mislead: A Case Study of Learning with Complementary Labels

---

### A. Proofs

#### A.1. Proof of Proposition 1

*Proof.* Let  $\boldsymbol{\eta}$  and  $\bar{\boldsymbol{\eta}}$  denote the conditional distribution  $\mathbb{P}(Y | X)$  and  $\mathbb{P}(\bar{Y} | X)$  respectively, where  $\boldsymbol{\eta}_k(x) = \mathbb{P}(Y = k | x)$  and  $\bar{\boldsymbol{\eta}}_k(x) = \mathbb{P}(\bar{Y} = k | x)$ . Since  $\bar{y}$  only depends on  $y$ , we have  $\bar{\boldsymbol{\eta}}(x) = T^\top \boldsymbol{\eta}(x)$ . The unbiased risk estimator can be derived as follows:

$$\begin{aligned} R(\mathbf{g}; \ell) &= \mathbb{E}_{(x,y) \sim D}[\ell(y, \mathbf{g}(x))] = \mathbb{E}_X \mathbb{E}_{Y \sim \boldsymbol{\eta}(X)}[\ell(Y, \mathbf{g}(X))] \\ &= \mathbb{E}_X[\boldsymbol{\eta}(X)^\top \ell(\mathbf{g}(X))] = \mathbb{E}_X[\bar{\boldsymbol{\eta}}(X)^\top (T^{-1}) \ell(\mathbf{g}(X))] \\ &= \mathbb{E}_{(x,\bar{y}) \sim \bar{D}}[e_{\bar{y}}^\top (T^{-1}) \ell(\mathbf{g}(x))] \end{aligned}$$

□

#### A.2. Proof of Proposition 2

*Proof.* Given the following two properties of  $\ell_{01}$ :

$$\begin{aligned} \sum_{i=1}^K \ell_{01}(i, \mathbf{g}(x)) &= K - 1 \quad \text{and} \\ \ell_{01}(\bar{y}, \mathbf{g}(x)) + \bar{\ell}_{01}(\bar{y}, \mathbf{g}(x)) &= 1 \end{aligned}$$

An unbiased risk estimator of classification error can be obtained by:

$$\begin{aligned} R(\mathbf{g}; \ell_{01}) &= \mathbb{E}_{(x,\bar{y}) \sim \bar{D}} \left[ -(K-1)\ell_{01}(\bar{y}, \mathbf{g}(x)) + \sum_{j=1}^K \ell_{01}(j, \mathbf{g}(x)) \right] \\ &= \mathbb{E}_{(x,\bar{y}) \sim \bar{D}} \left[ (K-1)(1 - \ell_{01}(\bar{y}, \mathbf{g}(x))) \right] \\ &= (K-1) \mathbb{E}_{(x,\bar{y}) \sim \bar{D}} \left[ \bar{\ell}_{01}(\bar{y}, \mathbf{g}(x)) \right] = (K-1) \bar{R}(\mathbf{g}; \bar{\ell}_{01}) \end{aligned}$$

□

#### A.3. Proof of Proposition 3

*Proof.* The proposition can be derived by using the linearity of the gradient operator:

$$\begin{aligned} \mathbb{E}_{\bar{y}|y}[\nabla_{\theta} \bar{\ell}(\bar{y}, \mathbf{g}(x))] &= \nabla_{\theta} \mathbb{E}_{\bar{y}|y}[\bar{\ell}(\bar{y}, \mathbf{g}(x))] \\ &= \nabla_{\theta} \left[ \frac{1}{K-1} \sum_{y' \neq y} \left[ -(K-1)\ell(y', \mathbf{g}(x)) + \sum_{j=1}^K \ell(j, \mathbf{g}(x)) \right] \right] \\ &= \nabla_{\theta} \left[ - \sum_{y' \neq y} \ell(y', \mathbf{g}(x)) + \sum_{j=1}^K \ell(j, \mathbf{g}(x)) \right] = \nabla_{\theta} \ell(y, \mathbf{g}(x)) \end{aligned}$$

□
